# Supplementary material for: Microstructure analysis of complex CuO/ZnO@carbon adsorbers: what are the limits of powder diffraction methods?
Source: Royal Society of Chemistry journal article supplement (doi:10.1039/c5cp01135c), 2015-01-01
Supplement: c5cp01135c1.pdf [file c5cp01135c1.pdf]

## Supplementary Information

### Microstructure analysis of complex CuO/ZnO@carbon adsorbers: What are the limits of powder diffraction methods?

J.C. Tseng,<sup>a</sup> W. Schmidt,<sup>a</sup> U. Sager,<sup>b</sup> E. Däuber,<sup>b</sup> A. Pommerin<sup>a</sup> and C. Weidenthaler,<sup>a\*</sup>

<sup>a</sup> Max-Planck-Institut für Kohlenforschung, Mülheim an der Ruhr, Germany

<sup>b</sup> Institut für Energie- und Umwelttechnik e.V., Duisburg, Germany

#### Diffraction

For pure CuO synchrotron data have been collected at ESRF (ID15B) in transmission geometry using a wavelength of 0.143165 Å. The final fit obtained from WPPM is shown in Figure S1(a), the comparison of the domain size distributions is shown in Figure S1(b).

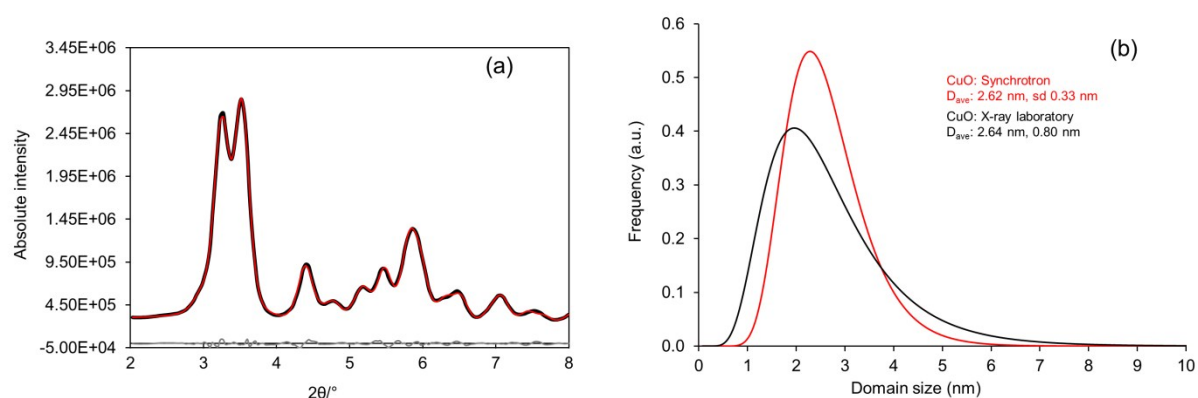

Figure S1: (a) WPPM results obtained for pure CuO. Experimental data measured black line, modeled profile: red line, difference plot: gray line. (b) Domain size distributions obtained for the pure crystalline compound from synchrotron and laboratory data.

#### X-Ray Photoelectron Spectroscopy

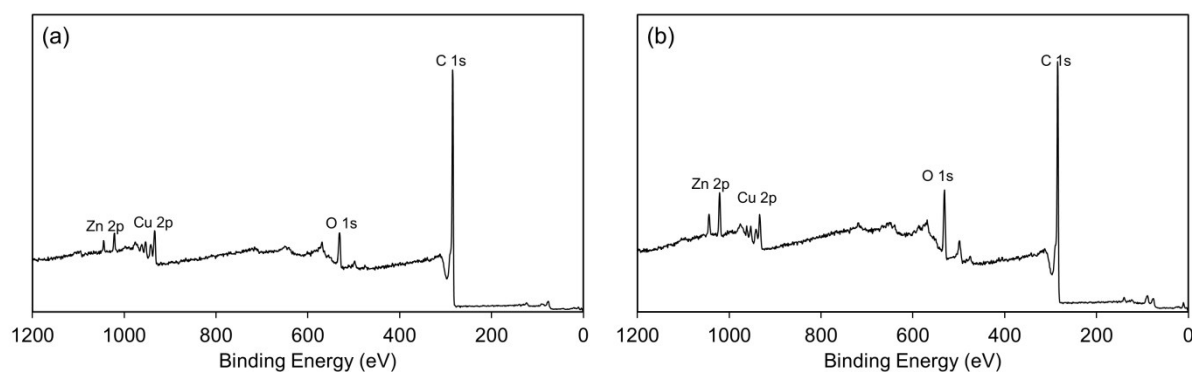

Figure S2: XPS survey scan obtained for the real catalyst (a) before and (b) after NO<sub>2</sub> removal experiments.
